# Supplementary material
Source: HighWire-hosted journal article supplement (https://cmaj.ca/highwire/filestream/57921/field_highwire_adjunct_files/0/medline_haynes_appendix.pdf)
Supplement: medline_haynes_appendix.pdf [file medline_haynes_appendix.pdf]

---

## e-Appendix 1: Journals read for the health services research (HSR) database

---

|                                                   |                                                                     |
|---------------------------------------------------|---------------------------------------------------------------------|
| Acta obstetrica et gynecologica Scandinavica*     | Gastroenterology*                                                   |
| Acta psychiatrica Scandinavica*                   | Health Affairs‡§                                                    |
| Addiction*                                        | Health Care Financing Review ‡§                                     |
| Age and Ageing*                                   | Health Economics‡§                                                  |
| American Journal of Cardiology*                   | Health Policy†                                                      |
| American Journal of Medicine*†                    | Health Psychology*                                                  |
| American Journal of Obstetrics and Gynecology*†   | Health Services Research§¶                                          |
| American Journal of Psychiatry*                   | International Journal of Technology Assessment in Health Care†§     |
| American Journal of Public Health*†               | Journal of Affective Disorders*                                     |
| American Journal of Surgery*                      | Journal of Bone and Joint Surgery – American Volume*                |
| Annals of Emergency Medicine*                     | Journal of Clinical Epidemiology*                                   |
| Annals of Internal Medicine*†                     | Journal of Clinical Oncology*                                       |
| Annals of Medicine*                               | Journal of Epidemiology and Community Health*                       |
| Annals of Surgery*                                | Journal of General Internal Medicine*                               |
| Annals of the Rheumatic Diseases*                 | Journal of Health Economics‡§                                       |
| Archives of Disease in Childhood*                 | Journal of Health Politics, Policy and Law ¶                        |
| Archives of Family Medicine*                      | Journal of Infectious Diseases*                                     |
| Archives of Internal Medicine*†                   | Journal of Internal Medicine*                                       |
| Archives of Neurology*                            | Journal of Rheumatology*                                            |
| Archives of Pediatric and Adolescent Medicine*    | Journal of the American Academy of Child and Adolescent Psychiatry* |
| Archives of Physical Medicine and Rehabilitation* | Journal of the American Board of Family Practice*                   |
| Archives of Surgery*                              | Journal of the American Medical Association*†‡                      |
| Arthritis and Rheumatism*                         | Journal of Trauma*                                                  |
| BMJ* †‡                                           | Journal of Vascular Surgery*                                        |
| British Journal of General Practice*              | Lancet*†                                                            |
| British Journal of Psychiatry*                    | Medical Care*†‡§                                                    |
| British Journal of Surgery*                       | Medical Decision Making†§                                           |
| Canadian Journal of Public Health*                | Medical Journal of Australia*†                                      |
| Canadian Medical Association Journal*†            | Milbank Quarterly§                                                  |
| Cancer*                                           | New England Journal of Medicine*†                                   |
| Child Development*                                | Pain*                                                               |
| Diabetes Care*                                    | Psychiatric Services*                                               |
| Diabetic Medicine*                                | Radiology*†                                                         |
| Fertility and Sterility*                          | Social Science and Medicine*†‡                                      |

\*Journals reviewed by 4 evidence-based health care publications (ACP Journal Club, Evidence-Based Medicine, Evidence-Based Nursing and Evidence-Based Mental Health (first journal list described in Methods section)).

†Journals identified in a survey conducted by Elixhauser et al<sup>12</sup> (first of 3 sources of second journal list described in Methods section).

‡Journals identified in a report on MEDLINE searches for HSR written by 2 associate fellows of the National Library of Medicine (Allmang NA, Koonce TY. Health services research topic searches. Bethesda [MD]: National Library of Medicine; 2000. Unpublished report) (third journal list described in Methods section).

§Journals derived from the Science Citation Index (SCI) ratings for the SCI category "health care sciences and services" (second of 3 sources of second journal list described in Methods section).

¶Journals derived through input from policy-makers (third of 3 sources of second journal list described in Methods section).
